# Supplementary material for: Development of a rapid biolistic assay to determine changes in relative levels of intracellular calcium in leaves following tetracycline uptake by pinto bean plants
Source: Royal Society of Chemistry journal article supplement (doi:10.1039/b902147g), 2009-01-01
Supplement: b902147g.pdf [file b902147g.pdf]

Supplementary data for Farkas et al., 2009, “Development of a rapid biolistic assay to determine changes in relative levels of intracellular calcium in leaves following tetracycline uptake by Pinto bean plants.”

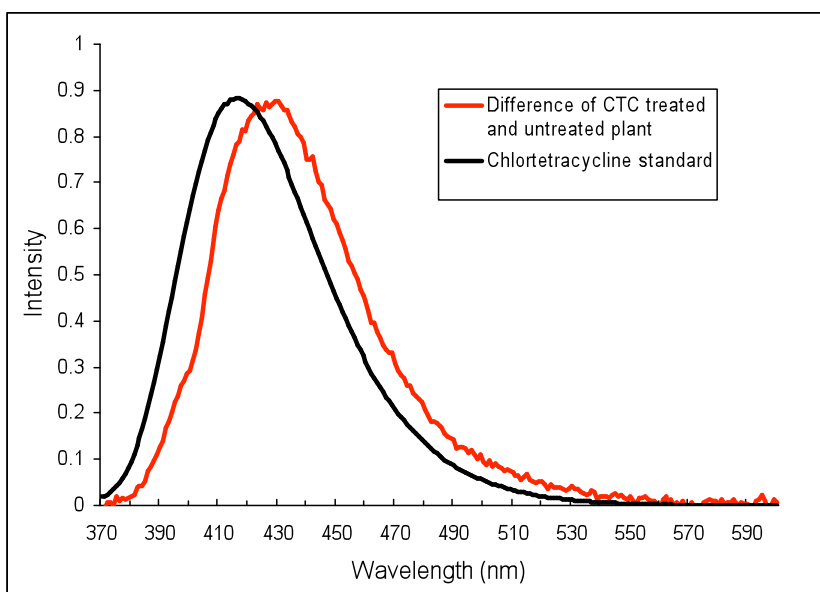

**Supplementary Data Fig. S1.** Emission spectra of CTC standard (black) compared to the corrected emission spectra of CTC-treated plant (emission spectra from untreated plant extract was subtracted the from emission spectra of treated plant).

As discussed in the manuscript, fluorescence from the sample matrix resulted in a slight red shift on the iCTC emission spectra in the treated plant, which shows the emission spectra of iCTC in the plant extract and that of an iCTC standard in the extracting solvent. On the other hand, no conclusive results are observed spectrofluorimetrically from the extract of TC-treated Pinto beans because TC and its degradation product are not as fluorescent as iCTC.
